# Supplementary material
Source: PubMed Central journal article supplement (PMC4407250)
Supplement: mmc1.pdf [file mmc1.pdf]

# Effects of Cardiolipin on Membrane Morphology: A Langmuir Monolayer Study

**Authors:** Minh Dinh Phan and Kwanwoo Shin\*

Department of Chemistry and Institute of Biological Interfaces, Sogang University, 35 Baekbeom-ro, Mapo-gu, Seoul 121-742, Korea

Keywords: Cardiolipin, Langmuir Monolayer, Isotherm, Phospholipids

\*Corresponding author. (K. S.) Email: kwshin@sogang.ac.kr; Tel: 82-2-705-8441; Fax: 82-2-701-0967

## SUPPORTING MATERIAL

### Supporting Figures

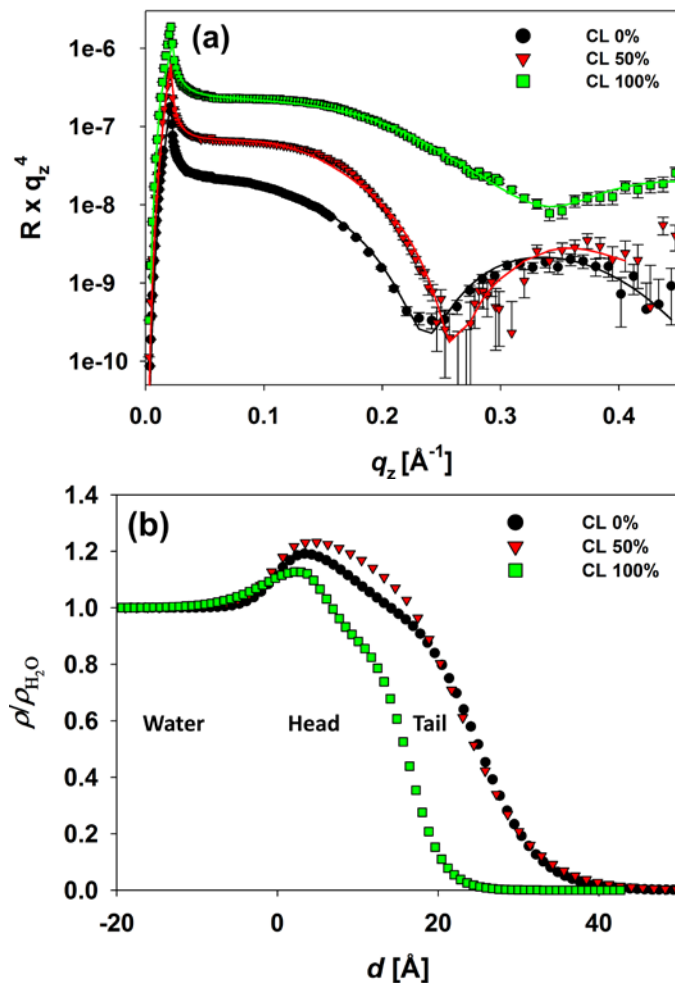

Figure S1: (a) XR curves measured at the water-air interface for monolayers composed of  $\Phi_{\text{CL}} = 50 \text{ mol}\%$ , in comparison with pure DPPC (CL 0%) and pure CL (CL 100%). The solid lines are the least-square fits. (b)

Corresponding normalized electron density profiles of monolayers obtained from the reflectivity fits of (a). All of measurements were carried out at  $\pi = 30$  mN/m. The temperature was maintained at 16 °C.

Table S1: X-ray reflectivity fitting parameters for  $\Phi_{\text{CL}} = 50$  mol%, in comparison with smaller molar ratios of CL, where the electron density  $\rho_{\text{h}}$  and  $\rho_{\text{t}}$ , the thickness  $d_{\text{h}}$  and  $d_{\text{t}}$  for the headgroup and the tail group regions, respectively, and the interfacial roughnesses  $\sigma_{\text{h/t}}$  and  $\sigma_{\text{t/a}}$  for headgroup/tail and tail group/air interfaces, respectively.

|      | $\sigma_{\text{w}}$ (Å) <sup>b</sup> | $\rho_{\text{h}}$ (e <sup>-</sup> /Å <sup>3</sup> ) <sup>a</sup> | $\sigma_{\text{h/t}}$ (Å) <sup>b</sup> | $d_{\text{h}}$ (Å) <sup>b</sup> | $\rho_{\text{t}}$ (e <sup>-</sup> /Å <sup>3</sup> ) <sup>a</sup> | $\sigma_{\text{t/a}}$ (Å) <sup>b</sup> | $d_{\text{t}}$ (Å) <sup>b</sup> |
|------|--------------------------------------|------------------------------------------------------------------|----------------------------------------|---------------------------------|------------------------------------------------------------------|----------------------------------------|---------------------------------|
| 0%   | 3.0                                  | 4.51                                                             | 5.9                                    | 8.5                             | 3.60                                                             | 6.6                                    | 16.6                            |
| 5%   | 3.0                                  | 4.76                                                             | 7.5                                    | 8.0                             | 3.50                                                             | 5.4                                    | 16.5                            |
| 10%  | 3.0                                  | 4.65                                                             | 7.9                                    | 8.0                             | 3.45                                                             | 5.3                                    | 16.5                            |
| 20%  | 3.0                                  | 4.64                                                             | 9.9                                    | 8.0                             | 3.65                                                             | 6.3                                    | 17.0                            |
| 50%  | 3.0                                  | 4.67                                                             | 10.1                                   | 7.9                             | 4.28                                                             | 8.0                                    | 14.7                            |
| 100% | 5.7                                  | 4.40                                                             | 3.1                                    | 5.7                             | 3.18                                                             | 3.7                                    | 10.6                            |

<sup>a</sup> The uncertainty of  $\rho$  was 2% of the value. <sup>b</sup> The error range of  $\sigma$  and  $d$  was  $< \pm 0.2$  Å.
