# Supplementary material
Source: PubMed Central journal article supplement (PMC4407250)
Supplement: mmc2.pdf [file mmc2.pdf]

## Article

# Effects of Cardiolipin on Membrane Morphology: A Langmuir Monolayer Study

Minh Dinh Phan<sup>1</sup> and Kwanwoo Shin<sup>1,\*</sup><sup>1</sup>Department of Chemistry and Institute of Biological Interfaces, Sogang University, Seoul, Korea

**ABSTRACT** Cardiolipin (CL) is a complex phospholipid that is specifically found in mitochondria. Owing to the association of the CL levels with mitochondrial physiopathology such as in Parkinson's disease, we study the molecular effect of CL on membrane organization using model Langmuir monolayer, fluorescence microscopy, and x-ray reflectivity. We find that the liquid-expanded phase in membranes increases with increasing CL concentration, indicating an increase in the elasticity of the mixed membrane. The Gibbs excess free energy of mixing indicates that the binary monolayer composed of CL and DPPC is most thermodynamically stable at  $\Phi_{CL} = 10$  mol %, and the stability is enhanced when the surface pressure is increased. Additionally, when  $\Phi_{CL}$  is small, the expansion of the membrane with increasing CL content was slower at higher surface pressure. These abnormal results are indicative of a folding structure being present before a collapsing structure, which was confirmed by using fluorescence microscopy and was characterized by using x-ray reflectivity with the electron density profile along the membrane's surface normal.

## INTRODUCTION

The mitochondrion is a special organelle and has been one of the classical subjects in biology owing to its specific functions that carry out adenosine triphosphate synthesis and apoptosis, and to its independent role in eukaryotic cells (1–3). The biological functions of the mitochondrion are interesting, but the exact mechanism of how the highly-folded membrane of mitochondrial cristae, which creates a large surface area within a volume-constraining outer membrane, is formed is an intriguing subject as well. However, the capability of lipid compartments to create the folding topology without support of the membrane proteins remains controversial (4).

The folding of the inner mitochondrial membrane raises a question as to whether it can be regulated intrinsically by the lipid components on the membrane. Among the various types of phospholipids that make up the mitochondrial membrane, cardiolipin (CL) exclusively exists in the membranes of bacteria and mitochondria (5). CL is a unique phospholipid with a dimeric structure, carrying two negative charges on a small acidic headgroup and having a large hydrophobic tail formed by four acyl chains with various lengths. CL is primarily localized in the inner membrane of mitochondria, where it represents ~25% of the total phospholipid content (6). CL is important in maintaining the structure and the morphology of the mitochondrial cristae (4,7,8). Any alteration in the CL levels leads to a mitochondrial physiopathology such as heart failure (9), diabetes (10), Barth syndrome (11), and Parkinson's disease (12).

Ohtsuka et al. (13) reported that a drop of 30% in the CL content caused a drastic alteration of the mitochondrial structure. All mitochondria appeared to be greatly enlarged and swollen, and cristae were lacking or disorganized. However, defects in phosphatidylserine and sphingolipid biosynthesis had no significant effects on the shapes, sizes, or cristae contents of the mitochondria. The results suggest that an alteration of mitochondrial ultrastructure is specifically associated with a reduction in CL content, rather than some other abundant lipids on the mitochondrial membrane (13). In *in vitro* studies, with model systems composed of CL-containing giant unilamellar vesicles, creation of a localized pH gradient induced a cristae-like morphology in the vesicles. This phenomenon was not observed for lipid vesicles without CL. The results support the ideas that adenosine triphosphate synthase in the cristae membrane is coupled with CL to produce a maximum curvature of the membrane and that the cristae morphology becomes self-maintaining (8,14).

Despite its central role in cellular function, and its being associated with the mitochondrial ultrastructure, which has been well confirmed in cell, the molecular effects of CL on membrane organization and dynamics remain poorly understood. Previously the role of CL in modulating membrane properties and membrane integrity has been probed using biophysics model membranes, including monolayer, bilayer, and vesicle systems. Model membrane studies determined that the incorporation of CL strongly affected the thermodynamic properties of lipid monolayers (15,16) and bilayers (15,17–19). Monolayer analyses indicate that a mixture of EPC (egg phosphatidylcholine) and CL in specific mixed ratios and at specific pressures is thermodynamically stable, even though the apparent area compressibility

Submitted December 18, 2014, and accepted for publication March 17, 2015.

\*Correspondence: kwshin@sogang.ac.kr

Editor: Arne Gericke.

© 2015 by the Biophysical Society  
0006-3495/15/04/1977/10 \$2.00

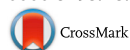

modulus and the lysis tension of vesicle structures decreases with increasing CL content. Both suggest a decrease in the lateral interaction between the monolayer leaflets, which means that less energy is needed to stretch the membrane (15). Such an effect would likely decrease the energy required to create folds in the inner mitochondrial membrane. Due to its chemical structure, CL may form micellar, lamellar, and hexagonal states in an aqueous dispersion, depending on the pH and ionic strength of the environment (17–20). The abundance of high curvature zones in mitochondrial cristae might also be attributed to the intrinsic curvature of the CL molecule (7,21).

To the best of our knowledge, no direct report on model monolayer has been provided to prove the potential role of CL for inducing the folding structure of the mitochondrial cristae at molecular scale. In our study, we systematically investigated the molecular effect of CL on the mechanical properties of monolayers by means of Langmuir  $\pi$ - $A$  isotherms, followed by the lateral and vertical morphological characterizations by using fluorescence microscopy and x-ray reflectivity, respectively. Particularly, a mixed monolayer composed of CL, a highly-unsaturated and doubly-negatively charged lipid, and DPPC (dipalmitoylphosphatidylcholine) (Fig. 1), a fully saturated and neutral lipid, provides a critical model monolayer for studying the thermodynamics and the mechanical properties of membranes as a function of CL content by Langmuir isotherms. The lateral interaction model estimated from the isotherms will be visualized by fluorescence microscopy. The mechanism of collapsed formation clearly observed by fluorescence microscopy is finally revealed by x-ray reflectivity, with the electron density profile perpendicular to the membrane's surface, at medium pressure.

## MATERIALS AND METHODS

CL (cardiolipin (heart, bovine-disodium salt)), DPPC (1,2-dipalmitoyl-*sn*-glycero-3-phosphocholine), POPC (1-hexadecanoyl-2-(9Z-octadecenoyl)-

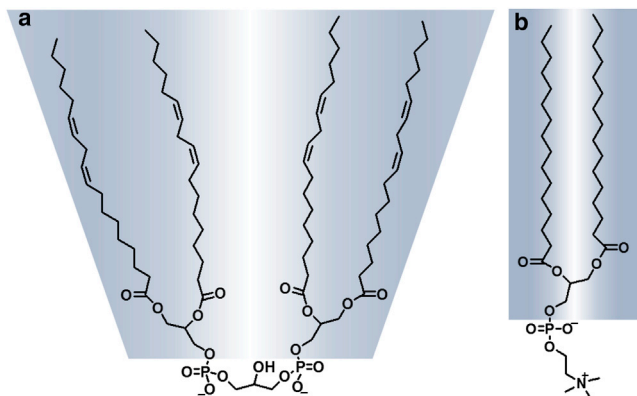

FIGURE 1 Chemical structures of (a) CL and (b) DPPC. To see this figure in color, go online.

*sn*-glycero-3-phosphocholine), DOPC (1,2-di-(9Z-octadecenoyl)-*sn*-glycero-3-phosphocholine), and DLPA (1,2-dilinoleoyl-*sn*-glycero-3-phosphate) were all purchased from Avanti Polar Lipids (Alabaster, AL). The fluorescent probe, Texas Red, was purchased from Invitrogen (Carlsbad, CA). Chloroform, methanol, sodium chloride, and calcium chloride were bought from Jin Chemical Pharmaceutical (Gyeonggi-do, Korea). All chemicals and phospholipids were used without further purification. The subphase was pure water (pH 5.7) treated with a Labtech-Purelab Classic system (system resistivity, 18 M $\Omega$  cm; Daihan Labtech, Namyangju-si, Gyeonggi-do, Korea). Stock solutions of DPPC, DOPC, POPC, and CL, 1 mg/mL, were prepared in a chloroform and methanol (5:1) (v:v) mixture.

## Surface pressure measurements

Surface pressure-area ( $\pi$ - $A$ ) isotherms were recorded at a compression rate of 10 cm<sup>2</sup> min<sup>-1</sup> in a symmetric mode by using a Langmuir trough (model No. 611M; NIMA Technology, The Science Park, Coventry, UK) containing a DI water subphase. The total compression area of the Langmuir trough was 30–20 cm<sup>2</sup>, and the trough was placed in a plexiglass enclosure to prevent air vibration. Before every experiment, the trough and the barriers were cleaned with chloroform and were rinsed twice with DI water. The water subphase was also treated until the compression and the expansion of the barriers remained at constant pressure ( $\pm 0.1$  mN/m). Solutions containing mixed phospholipids in chloroform at various molar ratios, ranging from 0 to 100 mol % of CL, were prepared and spread onto the interface by using a microsyringe (Hamilton, Reno, NV). Typically, the compression was initiated 15 min after spreading to allow for the evaporation of chloroform and the stabilization of the membrane structures. The value  $\pi$  was monitored with a Wilhelmy article probe hanging from a high precision microbalance connected to a computer, and is defined as

$$\pi = \gamma_0 - \gamma, \quad (1)$$

where  $\gamma_0$  is the surface tension of the air-water interface and  $\gamma$  is the surface tension in the presence of a mixed monolayer compressed to varying packing densities.

## Analysis of isotherms

The value of the monolayer compressibility ( $C_s$ ) for an indicated film composition at a given surface pressure  $\pi$  was obtained from the  $\pi$ - $A$  data by using

$$C_s = (-1/A_\pi) \times (dA/d\pi), \quad (2)$$

where  $A_\pi$  is the area per molecule at the indicated surface-pressure  $\pi$ . For convenience, we further analyzed our data in terms of the reciprocal isothermal compressibility, i.e., the elastic modulus of the area compressibility ( $C_s^{-1}$ ) as described previously in Smaby et al. (22), because this facilitated comparisons with measurements made in bilayer systems. Accordingly, the higher the value of  $C_s^{-1}$ , the lower the interfacial elasticity. We selected a pressure value, which is closest to integer, to represent each pressure elevated by the lateral compression. We used the averaging method for every four-points to smoothen the  $\pi$ - $C_s^{-1}$  curve at regions exhibiting high fluctuations.

The value of the excess Gibbs free energy of mixing,  $G_E$ , which is indicative of the thermodynamic stability of mixed monolayers, was determined by using

$$G_E = \int_0^\pi [A_{12} - (\phi_1 A_1 + \phi_2 A_2)] d\pi, \quad (3)$$

where  $A_i$  and  $\Phi_i$  are the molecular area and mole fraction values of each component, respectively, and  $A_{12}$  is the average area per molecule of the mixture (23).

## Fluorescent microscopy

For fluorescence microscopy, a Langmuir trough (KSV NIMA 302M; Biolin Scientific, South Stockport, Cheshire, UK) with a glass window at the bottom was mounted on an inverted fluorescence microscope (Eclipse TE2000-U; Nikon, Melville, NY). The temperature was maintained at 16°C by using an external water bath with a thermostat. To minimize the lateral diffusion and the thermal fluctuations in the monolayer at the air-water interface, the temperature used for imaging the lipid domains was intentionally made lower than that needed to obtain the isotherms; this made the lipid more rigid and provided a condition similar to that of a collapsed phase at high pressure so that the folding structure could be observed. The stock solution of Texas Red in chloroform was added to the pure, nonfluorescence mixed lipid solution, 1 mol %. The monolayers were then compressed and maintained at target pressures by using continuous, low-speed asymmetric compression at a rate of 10 cm<sup>2</sup> min<sup>-1</sup>. During compression, images of the monolayer were collected by using a 20× objective lens and a high-speed camera, which allowed 1000 frames/s, enabling us to record a video of the dynamic structure and the phase transition of the membrane structure in real-time. The probe molecules were excluded from densely-packed structure of the LC phase, providing contrast between the liquid-expanded (LE) and liquid-condensed (LC) phases. A mercury lamp was used to excite the fluorescence probes, and a wavelength filter was used for imaging. Discrimination between the excitation (595 nm) and the emission (605 nm) fluorescence from the dye (Texas Red) was regulated by using dichroic mirrors and interchangeable cut-off filters.

## X-ray reflectivity

X-ray reflectivity was performed using a D8 Advance (Bruker AXS, Karlsruhe, Germany) with a vertical goniometer, which allowed the liquid's surface to be studied without disturbing the Langmuir trough during the measurements. The Langmuir trough was enclosed in a plexiglass box with Kapton windows, and the incoming and the reflected beams were detected through Kapton-covered windows. The Langmuir trough setup was placed on an antivibration table (Halcyonics NANO 30; Accurion, Göttingen, Germany). A ceramic anode x-ray generator was used to produce Cu K $\alpha$  radiation ( $\lambda = 1.542 \text{ \AA}$ ), and a parallel incident beam was produced by using a Göbel mirror (GM III). Two slits before the sample defined the incident beam size and reduced the vertical divergence (24). We repeatedly scanned the reflectivity to monitor the thickness ( $d$ ) and the electron density changes as functions of the CL mol % to understand the molecular effect of CL on the membrane's organization at the membrane-liquid interface. Each scan took a total of 4 h to acquire. The dispersion,  $\delta$ , which is the real part of the index of refraction, is given linearly in terms of the electron density,  $\rho$ , by  $\delta = \lambda^2 \rho r_0 / 2\pi$ , where  $r_0$  is the classical electron radius ( $2.82 \times 10^{-13} \text{ cm}$ ). The electron density profiles ( $\rho$ ) shown in this article were obtained from the dispersion profiles ( $\delta$ ) acquired from fits to these x-ray reflectivity data and were normalized by the electron density of water (25,26). The x-ray reflectivity  $R(q_z)$  is approximated from the simple Born approximation (27) by

$$R(q_z) \propto \frac{1}{q_z^4} \left| \int \frac{d\rho(z)}{dz} \exp(-iq_z z) dz \right|^2. \quad (4)$$

To analyze these x-ray reflectivity data, we used the recursive Parratt formalism (28). The sharp interfaces were smeared because of the root-mean-square roughness,  $\sigma$ , which was calculated by convoluting the infinitely sharp profile with a Gaussian smoothing function. We systematically varied and then optimized the fitting parameters ( $\rho$ ,  $d$ , and  $\sigma$ ) until the sums

of the squares, from the offsets ( $\chi^2$ ) of the points from the curve, were minimized.

## RESULTS

### $\pi$ -A isotherms for CL/DPPC monolayers

We purposely chose to use DPPC at temperatures that were well below its phase transition to perform the experiments, because the  $\pi$ -A isotherm of DPPC exhibits clearly a well-known LE-to-LC phase transition of DPPC. The LE and LC states are the overall state of membrane, which are mainly addressed in this study. By slowly compressing, the membrane will simultaneously change its structure corresponding to its phase, from the gas phase to the LE phase and then to the LC phase. The LE phase is where the lipid molecules start to get close to each other and reduce the freedom of molecular orientation. The LC phase is where lipid molecules start to pack tightly without freedom of orientation and tilt of acyl chains. If the membrane is compressed further, the solid phase and collapse are conducted. By varying the molar ratio of CL, the effect of CL on the phase of DPPC will be systematically investigated.

Compression isotherms (Fig. 2 a) were first recorded for binary mixtures of CL and DPPC. The isotherm for the latter lipid was in good agreement with the behavior reported previously in Phillips et al. (29), with a clearly discernible LE-LC phase transition that was displayed as a plateau at 3–7 mN/m on the isotherm. Data for CL/DPPC mixed monolayers revealed several interesting features. First, with increasing  $\Phi_{CL}$ , the LE-LC coexistence region progressively disappeared until it had completely disappeared at  $\Phi_{CL} = 40\%$  (Fig. 2 a), suggesting that the films with  $\Phi_{CL} \geq 40\%$  were predominantly in the LE state. The second feature of the isotherms is that the collapsed pressure of the films was nearly constant or increased slightly as a plateau for  $\Phi_{CL} \geq 40\%$  (Fig. 2 a)—which raises questions as to how the structure of the binary membrane can change upon continuous compression to maintain the pressure constant, and whether the folding structure can be induced before the collapsing structure. Also, to compare an expanding effect of CL in DPPC monolayers at different packing states, the isobars of the molecular area  $A$  versus  $\Phi_{CL}$  at surface pressures of 3 (before LE-LC coexistence), 7 (after LE-LC coexistence), and 10, 20, 30, and 40 mN/m were constructed (Fig. 2 b). Surface pressures  $\geq 20$  mN/m the presence of CL led to a slight expansion, whereas at pressures of 7 and 10 mN/m, the expansions were more pronounced, and at pressure of 3 mN/m, the expansion was almost linear. However, when  $\Phi_{CL} \geq 60\%$ , the expansions of the monolayers seemed to be more or less identical at every surface pressure. Accordingly, we may conclude CL to prefer the LE phase in monolayers and probably also liquefy the LC domains of DPPC, causing the overall expansion of the films.

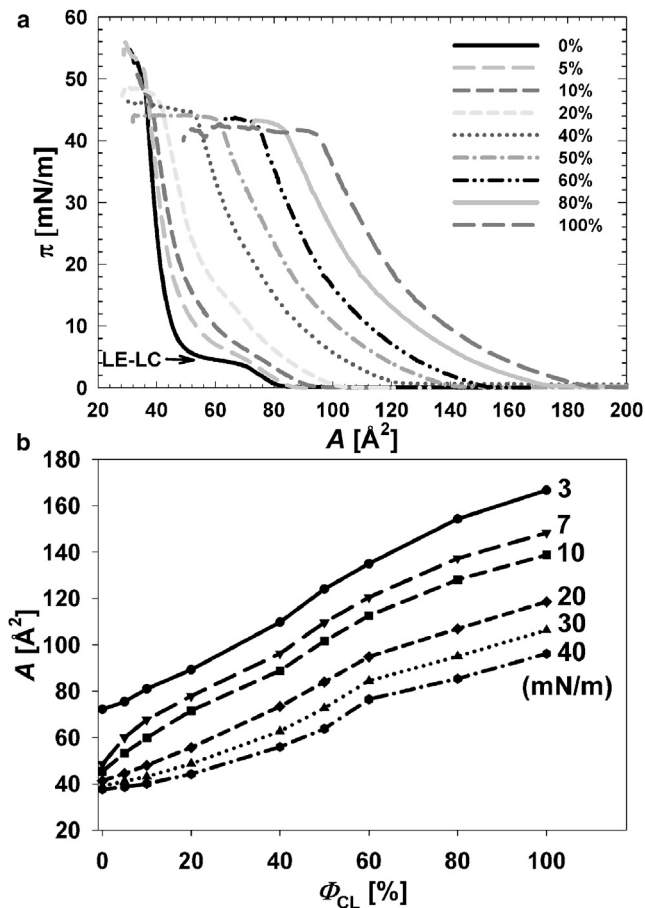

FIGURE 2 (a) Surface pressure-area isotherms ( $\pi$ - $A$  isotherms) of CL/DPPC mixed monolayers at various  $\Phi_{CL}$ , ranging from 0 to 100 mol %, at an air-water interface. The isotherms were recorded at a compression rate of  $10 \text{ cm}^2/\text{min}$  with total area of  $30 \times 20 \text{ cm}^2$ . The temperature was monitored and maintained at  $25^\circ\text{C}$ . (b) Variations in molecular areas  $A$  with  $\Phi_{CL}$  for mixed CL/DPPC monolayers at 3 (before LE-LC coexistence), 7 (after LE-LC coexistence), and 10, 20, 30, and 40 mN/m were calculated from the  $\pi$ - $A$  isotherms to understand the expanding effect of CL on mixed monolayers at different packing states.

### Thermodynamic properties of CL/DPPC monolayers

The excess free Gibbs energy of mixing,  $G_E$ , resulting from differences between the areas under the mixed isotherms and the weighted average of the single-component isotherms, provides information on whether a particular interaction is thermodynamically favored ( $G_E < 0$ ) or not ( $G_E > 0$ ) compared to an ideal mixture, where it is assumed that no difference exists in the interaction potentials when a molecule interacts with another molecule of the same molecular species or with a different one. Approximately, values of  $G_E > 0$  can be understood as a tendency for the molecules to interact preferentially with molecules of the same kind, leading to the observation of phase separation. Accordingly, a minimum, which is usually most negative, in the plot of  $G_E$  versus molar fraction is usually indicative

of the formation of a complex between molecules of different species (23).

The excess free energy of mixing,  $G_E$ , for all CL/DPPC mixed monolayers at different values of  $\Phi_{CL}$  were calculated from the  $\pi$ - $A$  isotherms according to Eq. 3, with  $\pi$  ranging from 5 to 40 mN/m. Some noticeable features can be seen in the diagram of  $G_E$  versus  $\Phi_{CL}$  in Fig. 3. First, immiscibility was evident at most values of  $\Phi_{CL}$ , probably due to a significant structural difference between the two lipid components. Second, when  $\Phi_{CL} > 40\%$ , the immiscibility of each composition increased greatly with increasing  $\pi$ . This phenomenon can probably be attributed to a repulsive interaction between the negatively-charged headgroups of CL. Third,  $G_E$  showed a minimum at  $\Phi_{CL} = 10 \text{ mol } \%$  for all  $\pi$  investigated, suggesting the formation of complex structure that is able to overcome the two above-mentioned factors that cause immiscibility. This complex structure at  $\Phi_{CL} = 10\%$  will be characterized and visualized more in this article.

### Interfacial elastic moduli of area compressibility of CL/DPPC monolayers

To compare the in-plane elastic packing interaction of lipid components composed of monolayers with increasing  $\Phi_{CL}$ , the interfacial elastic moduli of area compressibility  $C_s^{-1}$  as a function of lateral packing pressure  $\pi$  was determined (22), hence providing insight into the influence of the CL on the interfacial elasticity of the films. From Fig. 4 a, increasing  $\Phi_{CL}$  up to 20% significantly decreased  $C_s^{-1}$ ; indeed, the  $C_s^{-1}$  values at  $\pi = 30 \text{ mN/m}$  were 222, 137, 110, and 106 mN/m for  $\Phi_{CL} = 0, 5, 10,$  and 20 mol %, respectively, revealing an augmented elasticity of the mixed monolayers. From the  $\pi$ - $C_s^{-1}$  behavior of a pure DPPC monolayer, a sharp drop in the  $C_s^{-1}$  value was seen to occur

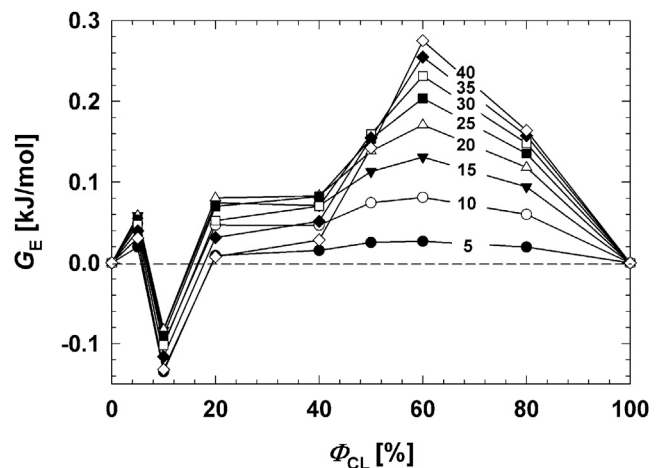

FIGURE 3 Excess Gibbs free energy of mixing,  $G_E$ , for all CL/DPPC mixed monolayers at different values of  $\Phi_{CL}$  with  $\pi$  ranging from 5 to 40 mN/m, was extracted from  $\rho$ - $A$  isotherms. (Horizontal dashed line) Visual guide only.



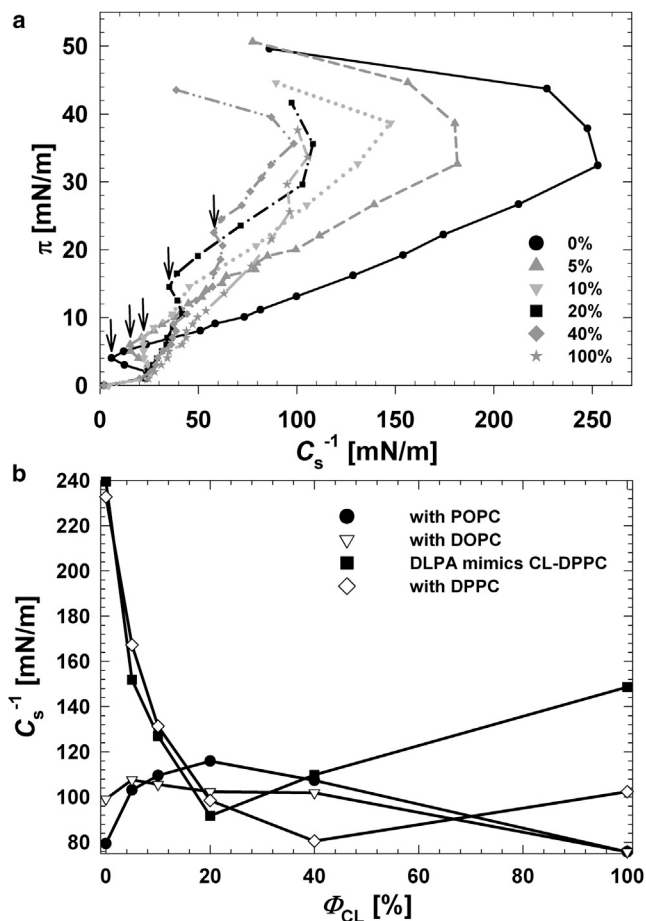

FIGURE 4 (a) Surface pressure  $\pi$  versus the elastic moduli  $C_s^{-1}$  of area compressibility calculated from the  $\pi$ -A isotherms for CL/DPPC mixed monolayers with various values of  $\Phi_{CL}$ : 0, 5, 10, 20, 40, and 100%. (Arrows) Visual guide only; pointing at the  $C_s^{-1}$  minima of plots. (b) Elastic moduli  $C_s^{-1}$  of binary monolayers composed of CL and various phosphatidylcholine lipids with different unsaturated degrees on acyl chains.

at surface pressures of 4 mN/m. The  $C_s^{-1}$  values were then seen to reverse sign and to increase to values more characteristic of a condensed phase at higher surface pressures. The dramatic drop in the  $C_s^{-1}$  values reflects both discontinuities in the lateral packing at phase boundaries and the accompanying lateral density fluctuations that are known to occur when the LE and the LC phases coexist. For this reason, plots of  $\pi$ - $C_s^{-1}$  proved to be an informative way to recognize the surface-pressure range over which fluid (LE) and condensed (LC) phases coexist. In addition, the minimum value of  $C_s^{-1}$  in the  $\pi$ - $C_s^{-1}$  plot, which reflects the LE-LC phase transition, became broader and shifted to higher  $\pi$ , from 4 to 24 mN/m, with increasing  $\Phi_{CL}$  from 0 to 40 mol %, respectively. This phenomenon indicated that the molecular effect of CL on the interfacial elasticity of the membranes was to shift the maximum in-plane elasticity to a higher surface pressure  $\pi$ . This phenomenon was also predicted as a common trend occurring when the lower melting-temperature lipids (30) or the molecules that had a

tendency to reorient themselves from random alignments at the interface to a relatively ordered perpendicular array (31) were mixed with DPPC in a binary monolayer membrane.

$C_s^{-1}$  versus  $\Phi_{CL}$  data at a physiologically relevant surface pressure of 30 mN/m for binary monolayers composed of CL with different types of lipids were constructed to better demonstrate an overall view of the molecular effect of CL on various membranes. From Fig. 4 b, for a CL/DPPC monolayer at 30 mN/m,  $C_s^{-1}$  dramatically diminished when  $\Phi_{CL}$  was increased to 20%, implying an enhancement of the elasticity of the films. Above that critical molar ratio,  $C_s^{-1}$  values were more or less identical. The maxima of the  $C_s^{-1}$ - $\Phi_{CL}$  plots for mixtures of CL with other lipids whose chemical structures had higher unsaturated degrees, e.g., POPC and DOPC, also generally had the same critical molar ratio of  $\Phi_{CL}$  20%. Note that the  $C_s^{-1}$ - $\Phi_{CL}$  behaviors for both mixtures with POPC and DOPC were opposite to that with DPPC due to the unsaturated degrees on the hydrocarbon chains of POPC and DOPC, even though the changes in the amplitudes of  $C_s^{-1}$  for both cases were not significant. This raises a question as to whether this critical  $\Phi_{CL}$  of 20% can be attributed only to CL's chemical structure and not to the other lipid components with which the CL is mixed. An additional experiment was carried out with DLPA, which is known to have half the chemical structure of CL. Consequently the DLPA molecule is expected to occupy half of the mean volume of the CL molecule. To mimic the effect of the chemical structure of CL, we used DLPA at a double molar concentration in the mixture with DPPC to make binary monolayers. Fig. 4 b showed that the  $C_s^{-1}$ - $\Phi_{CL}$  behaviors for CL/DPPC and DLPA/DPPC were almost identical for increasing  $\Phi_{CL}$  up to 20% and that the  $C_s^{-1}$  values of DLPA/DPPC were higher than those of CL/DPPC for  $\Phi_{CL} \geq 40\%$ . This difference is probably due to the intrinsic liquefying effect of CL itself, which is related to the preferentially LE characteristic of CL. This result answered a question raised earlier, in that the critical  $\Phi_{CL}$  of 20% is attributed only to the chemical structure of CL.

### Fluorescence microscopy of CL/DPPC monolayers

The impact of CL on the molecular organization of mixed membranes with DPPC was analyzed by using fluorescence microscopy to visualize the lateral distribution of the LE phase, which favors the fluorescent dye Texas Red ( $\Phi_{dye} = 1$  mol %) (Fig. 5). Differences in the dye solubility between the LE and the LC phases result in a contrast; the dark region contains tightly packed lipids in the LC phase. The dye is excluded from this solidlike phase and is localized in the loosely packed lipids in the LE phase surrounding the LC domains (32). The solid domains of DPPC started to appear when  $\pi$  coincided with the onset pressure for the LE-LC transition. A growth of continuous LC domains

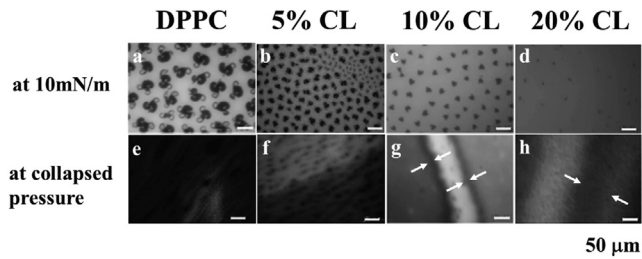

FIGURE 5 Fluorescent micrographs of (a) DPPC at 10 mN/m; (b) 5% CL at 10 mN/m; (c) 10% CL at 10 mN/m; (d) 20% CL at 10 mN/m; (e) DPPC at 60 mN/m; (f) 5% CL at 60 mN/m; (g) 10% CL at 55 mN/m, marking when the collapsed structures start to appear; and (h) 20% CL at 50 mN/m, showing the collapsed structures with unclear boundaries. (Dark domains) LC domains of DPPC; (open areas) LE phase of membranes composed of CL and DPPC. The temperature was maintained at 16°C. The temperature for fluorescence imaging was intentionally lower than for recording isotherms to minimize the lateral diffusion of the lipids. (Arrows) Visual guide only; marking two edges of the stripes or collapsed structures being observed. The scale bars represent 50  $\mu\text{m}$ .

with diameters of 30–40  $\mu\text{m}$  can be observed in Fig. 5 a at a pressure of 10 mN/m. The shapes and sizes of the LC domains of DPPC were in agreement with previous reports (33). Even though the condensed domains appear to be randomly arrayed and are observed to diffuse in the plane of the monolayer due to the Brownian motion, they rarely come into contact, indicating that the domains repel each other at short distances (34). At an equivalent  $\pi$  of 10 mN/m, an increase in  $\Phi_{CL}$  led to the LC domains of DPPC becoming smaller in size and less dense (Fig. 5, b–d). These observations reveal a liquefying effect of CL, which was proposed earlier in this article.

Upon further compression to the collapsed region, pure DPPC and mixed monolayers at  $\Phi_{CL} = 5$  mol % showed mostly dark areas that entirely covered the membrane's surface. However, at  $\Phi_{CL} = 10$  mol %, where the miscibility was the most energetically stable, the complex structures were observed on the fluorescence micrographs (Fig. 5 g). Thick uniform stripes surrounded by fluids with high fluorescence intensity were seen. The sizes of these uniform stripes were  $\sim 20$ – $30$   $\mu\text{m}$  and became larger at  $\Phi_{CL} = 20$  mol %. The exact size of stripes at  $\Phi_{CL} = 20$  mol % was unclear due to low contrast between the collapsed phase and the fluorescent fluids. This low contrast is probably due to the complete quenching of dye molecules when they come into contact with water (35). These stripes were composed of several domains layers with various thicknesses, which is indicative of a membrane with collapsed structure. These collapsed structures remain stable and are distinguishable at  $\Phi_{CL} = 10$ – $20$  mol % but disappeared at  $\Phi_{CL} \geq 40$  mol %.

### In situ x-ray reflectivity

Because the fluorescence images and the  $\pi$ -A isotherms give no direct information for the impact of CL on the structural

changes in the depth profile, we performed in situ x-ray reflectometry (XR) experiments. Hence, each dataset in Fig. 6 shows unique interference fringes, which contain the damping factors due to the surface roughness and an oscillating term due to the layer thicknesses without  $q^{-4}$  decay. In all cases, the reflectivity of the films clearly exhibits a single modulation, indicating a lipid monolayer with a well-defined structure. To describe the detailed structures, we used the effective-density model to refine a dispersion profile perpendicular to the film layer, with the goodness of fit being evaluated by monitoring the  $\chi^2$ -values (36).

We described the overall membrane structure as two homogenous layers on a water subphase (air/tailgroup/headgroup/subphase). The measured x-ray reflectivity profiles (Fig. 6 a, circles) matched very well with the structural model (Fig. 6 a, solid line), which subsequently provided

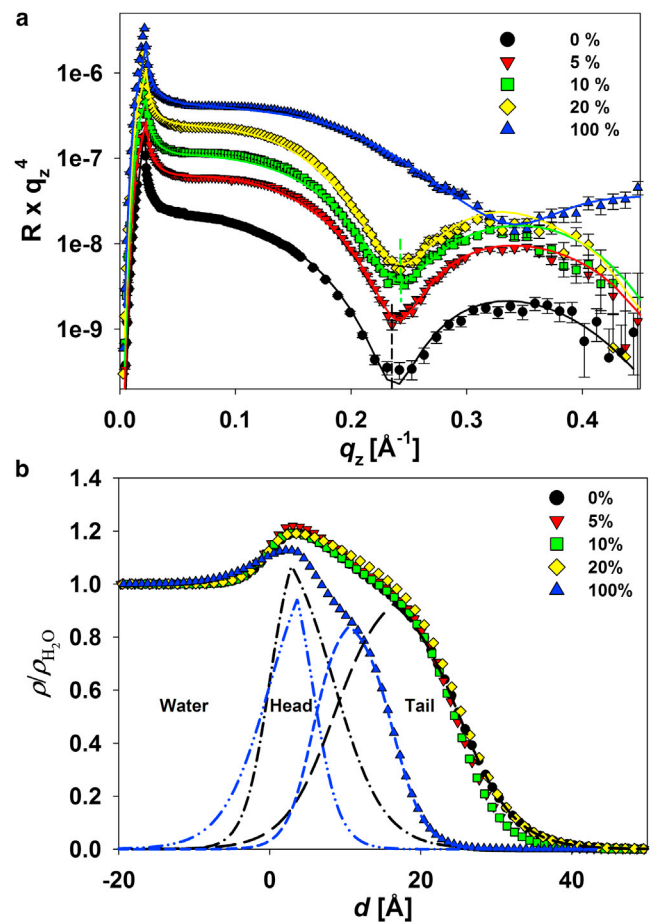

FIGURE 6 (a) XR curves measured at the water-air interface for monolayers composed of DPPC with various  $\Phi_{CL}$ . (Solid lines) Least-square fits. (b) Corresponding normalized electron density profiles of monolayers obtained from the reflectivity fits of (a). The electron density profiles of DPPC and CL were denoted as follows: (dash-dot-dash) DPPC's headgroup, (dash-dot-dot-dash) CL's headgroup, (long dash) DPPC's tail, and (short dash) CL's tail. Measurements were all carried out at  $\pi = 30$  mN/m. The temperature was maintained at 16°C. To see this figure in color, go online.

an average dispersion profile normal to the air-water interface that encompasses both the solid and the LE domains that exist at  $\pi = 30$  mN/m. Note that CL's headgroup is composed of two phosphate headgroups, leading to the electron density being higher than that of DPPC's headgroup, which is composed of only one phosphate. The hydrophobic tail of CL contains four hydrocarbon chains, while that of DPPC contains only two. However, the hydrocarbon chains of CL with a high degree of unsaturation are expected to strongly repel each other and to occupy a much larger volume than DPPC does. The repulsive force between CL molecules tends to hinder the packing capacity of the CL layer, consequently leading to a lower overall electron density and a smaller thickness compared to DPPC. At 30 mN/m, the membrane composed of 100% cardiolipin is expected to behave like a fluidic phase with randomly tilted tails, and to be less structurally defined. X-ray reflectivity data shown in Fig. 6 *a* prove this structural comparison. At a glance, the first minimum in the reflectivity curve for pure CL is significantly shifted to the higher  $q_z$  region, indicating that the total monolayer thickness has decreased; the lowered amplitude of the Kiessig fringe is significantly damped, revealing a low packing density of pure CL film. Accordingly, the lengths of the headgroups of DPPC and CL obtained from the fits of Fig. 6 *b* were  $\sim 8.5$  and  $5.7$  Å, respectively, while the lengths of the tailgroups of DPPC and CL were  $\sim 16.6$  and  $10.6$  Å, respectively. The electron densities of the headgroup region and the tail region of DPPC were  $\sim 4.51$  and  $3.60 e^{-}/\text{Å}^3$ , respectively, while those of CL were  $\sim 4.40$  and  $3.18 e^{-}/\text{Å}^3$ , respectively. Also, from the electron density profiles shown in Fig. 6 *b* for mixed monolayers, one can see that the electron densities of the head- and the tailgroup progressively decreased as  $\Phi_{CL}$  was increased, except for  $\Phi_{CL} = 20$  mol %. The amplitude of profile for  $\Phi_{CL} = 20$  mol % was slightly damped, implying that both head-tailgroup and tailgroup-air interfaces had been disturbed, leading to increases in roughness of 9.9 and 6.3 Å, respectively. These observations might be indicative of a reformation of CL molecules within the membrane, or the potential of a folding structure that is expected to be present before the collapsed region. The parameters obtained from the fits are described in Table 1.

## DISCUSSION

Previous studies on mitochondrial physiopathology suggest that any alteration in the CL level would lead to alteration in the mitochondrial cristae structure and morphology (14). Therefore, it was of interest to characterize the physical and the mechanical properties of membrane, as reflected in the molecular impact of CL on a mixed monolayer with DPPC.

The desired surface pressures were chosen based on the purpose of the experiments. Overall, for Langmuir  $\pi$ -*A* isotherms, we would like to systematically study the intermo-

**TABLE 1** X-ray reflectivity fitting parameters for CL/DPPC mixed monolayers

| %   | $\sigma_w$ (Å) <sup>b</sup> | $\rho_h$ ( $e^{-}/\text{Å}^3$ ) <sup>a</sup> | $\sigma_{hl}$ (Å) <sup>b</sup> | $d_h$ (Å) <sup>b</sup> | $\rho_t$ ( $e^{-}/\text{Å}^3$ ) <sup>a</sup> | $\sigma_{ta}$ (Å) <sup>b</sup> | $d_t$ (Å) <sup>b</sup> |
|-----|-----------------------------|----------------------------------------------|--------------------------------|------------------------|----------------------------------------------|--------------------------------|------------------------|
| 0   | 3.0                         | 4.51                                         | 5.9                            | 8.5                    | 3.60                                         | 6.6                            | 16.6                   |
| 5   | 3.0                         | 4.76                                         | 7.5                            | 8.0                    | 3.50                                         | 5.4                            | 16.5                   |
| 10  | 3.0                         | 4.65                                         | 7.9                            | 8.0                    | 3.45                                         | 5.3                            | 16.5                   |
| 20  | 3.0                         | 4.64                                         | 9.9                            | 8.0                    | 3.65                                         | 6.3                            | 17.0                   |
| 100 | 5.7                         | 4.40                                         | 3.1                            | 5.7                    | 3.18                                         | 3.7                            | 10.6                   |

Measured at various  $\Phi_{CL}$  for the respective electron density values  $\rho_h$  and  $\rho_t$ , thickness values  $d_h$  and  $d_t$  for head- and the tailgroup regions, and interfacial roughness values  $\sigma_{hl}$  and  $\sigma_{ta}$  for headgroup/tail and tailgroup/air interfaces.

<sup>a</sup>The uncertainty of  $\rho$  was 2% of the value.

<sup>b</sup>The error range of  $\sigma$  and  $d$  was  $< \pm 0.2$  Å.

lecular interaction between CL and DPPC, as functions of lateral compression (or surface pressure) and concentration of CL. The surface pressures for fluorescence microscopy experiments were selected at 10 mN/m (representing low pressure) and collapsed pressure (representing high pressure). This would be done to observe the effect of CL on LC domain of DPPC in terms of shape and size at low pressure, and the capability of CL to induce the collapsed structure on the membrane at high pressure. However, the reason for which we measured XR only at 30 mN/m is associated to the real cell system where the packing state is estimated  $\sim 30$ – $35$  mN/m (37). In addition, the XR measurement was inspired from the collapsed structure observed from fluorescence images, which is likely induced by CL. Our aim was to answer the question as to whether CL can induce the folding structure, which is the structural transition from the flat membrane to collapsed state upon further compression, at the physiologically relevant pressure of 30 mN/m. Indeed, we successfully observed the signature of folding structure, although it occurred very locally.

Regarding the CL ratio, the reasons for which we chose a low range of molar ratio of CL, from 5 mol % to 20 mol %, are also associated with physiologically relevant composition and experimental results from  $\pi$ -*A* isotherm and fluorescence microscopy. First, in a real cell system, the CL concentration is varied by age and its location, and ranged from 5% to 20% in molar ratio (6,38). From isotherm analyses and fluorescence microscopy, the mechanical properties of membrane at a higher molar ratio ( $\geq 40\%$ ) were predominant for CL. The CL domain of DPPC was difficult to observe by fluorescence at low pressure when the molar ratio of CL is  $\geq 40\%$ . Therefore, the effect of CL at higher molar ratios is not our interest in this study.

DPPC at the temperature used for the experiment is in the gel phase, while CL is in the fluid phase. Owing to the difference in the chemical structure of these two lipids, the mixed membrane is expected to undergo the phase separation. If those two lipids are phase-separated, gel and fluid states must coexist. This observation is in agreement with the literature (15,16), when two lipid components have a transition temperature above and below the temperature at

which the investigation has been carried out. However, from our observation in the isotherm, the elastic moduli diagram, and the fluorescence microscopy, the overall feature of membrane is predominated by CL's fluidic feature, even at small CL molar ratio. In other word, the overall feature of the mixed membranes is more fluid than gel state.

In brief, our thermodynamics analysis showed that a  $\Phi_{CL}$  of 10% was the most thermodynamically stable composition, regardless of the surface pressure, suggesting the formation of a complex structure that was able to manage the repulsive interaction between CL molecules (Fig. 3). As evidenced by the lateral interaction observed on fluorescence microscopy, as shown in Fig. 5, the liquefying effect of CL reduced the size and the density of the LC domains of DPPC and induced the formation of the collapsed structures being observed as uniform stripes of ~20–30 nm in size. These collapsed structures remained stable and were distinguishable in the range of  $\Phi_{CL}$  from 10 to 20 mol %. X-ray reflectivity showed that the increase in the electron density in the tail region and the increase in headgroup-tail and tail-air interfacial roughnesses for  $\Phi_{CL} = 20$  mol % might be a signature of a folding structure, which is followed by the collapsed structure observed by fluorescence microscopy in the collapsed region (Fig. 6 b and Table 1). In fact, at higher molar ratio of CL,  $\Phi_{CL} = 50$  mol % (Fig. S1 in the Supporting Material), the increase in electron density of the tail region and in the interfacial roughnesses was even more significant, indicating that the probability of folding structure occurrence was increased upon increase of CL's concentration. However, the film was still a monolayer structure overall, because the fold occurred very locally on the membrane.

Taken all together, the model of the effect of CL on the membrane is presented in Fig. 7. Upon incorporating CL into the monolayer, CL molecules liquefy DPPC from its LC domain to LE phase; and each CL molecule will pair up with DPPC molecules in a proper stoichiometry (39).

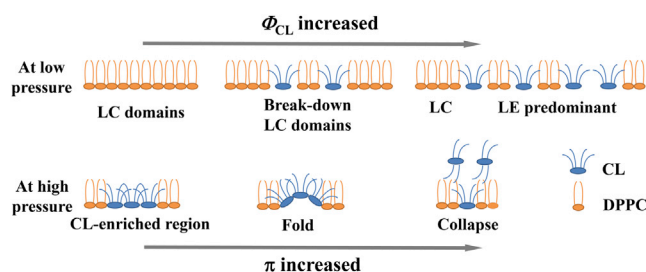

FIGURE 7 Schematic model of a possible arrangement of CL in mixed monolayers with DPPC during compression. At low pressure, the model shows how CL liquefies the LC domain of DPPC upon increase of the CL's concentration. At high pressure, the model explains how CL induces the folding structure locally on the membrane, before reaching the collapsed state upon further compression. Note that the model only highlights CL's effect on partial membrane. The folding structure's proof was detected from XR data, while the collapsed state was clearly observed by fluorescence microscopy. To see this figure in color, go online.

Once the CL molecules become more crowded, the probability of two CL molecules being in direct contact increases, but the system remains thermodynamically stable and miscible because of the decrease in the phase separation. Upon compression to high pressure, the CL-rich regions on the membranes start being stretched out of the plane of the membrane to create a folding structure. Upon further compression to the collapsed region, CL molecules start to be squeezed-out of the membrane and to form an apposed layer, with some of the hydrocarbon tails maintaining the hydrophobic interaction with the original membrane and others exposed to the air to stabilize the entire collapsed structure (Fig. 7). The model of hydrocarbon tails of CL having opposite directions was actually proposed in previous reports for a bilayer (40) and a cytochrome *c*-CL interaction (39).

The area expansion behavior with increasing  $\Phi_{CL}$  for  $\pi \geq 20$  mN/m (Fig. 2 b) showed the expansion rate slightly decreases when the compression is increased. This fact supports the model of the folding structure proposed in Fig. 7; with the same number of CL molecules on the membrane, a higher compression leads to a higher probability of CL molecules being in contact with each other and to more folding structures being induced. Furthermore, the Gibbs excess energy diagram (Fig. 3) implied that the mixed membranes were thermodynamically favored. From the model for a folding structure, one can see that the increased interfacial area by forming a curvature helps CL molecules to minimize the repulsive force caused by the unsaturated hydrocarbon chains and the negatively charged headgroups. The end of the folding process, which leads to the collapsed structure, is an even more thermodynamically favorable process—one in which the internal repulsion between hydrocarbon chains is drastically reduced. In the collapsed structure, the negatively-charged repulsion is completely gone on the apposed layer.

Lastly, the folding structure in the proposed model has been estimated in several previous studies on bilayers (15,18) and membrane-protein interactions (41) with the incorporation of CL. However, to the best of our knowledge, no report has provided a direct evidence for this curvature morphology on the monolayer system at the air/water interface. Note that the folding structures appear locally on the membrane. In addition, the folds are not well-defined structures because of the lateral dynamics of the membrane, especially for the membrane composed of a highly fluidic lipid such as CL. Therefore, the parameters obtained from the best fit of x-ray data can only reveal the signature of the folding structure by considering the electron density of the tail region and the roughness of both headgroup-tail and tail-air interfaces. In summary, our data obtained from different interfacial characterizations strongly support the presence of a folding structure before the collapse. This folding structure is crucial in understanding the impact of CL on the structure of mitochondrial cristae.



## CONCLUSIONS

We have analyzed the impact of CL on the structure, mechanical properties, and morphology of model lipid monolayers. We found that the LE phase of pure DPPC membranes increased with increasing CL concentration, indicating an increase in the elasticity of the mixed membrane. The Gibbs excess free energy of mixing was the most negative value at  $\Phi_{CL} = 10$  mol %, and the stability was enhanced when the surface pressure was increased. Additionally, in the range of  $\Phi_{CL} \leq 50$  mol %, the expansion of the membrane's area with increasing CL content was slower at higher surface pressure. These abnormal results are indicative of the presence of a folding structure before a collapsing structure, which was confirmed by using fluorescence microscopy and was characterized by x-ray reflectivity with the electron density profile along the membrane's surface,  $d\rho(z)/dz$ . Altogether, our results support the role of CL in the induction of the membrane alterations involved in the remodeling, deformation, and permeability of biological membranes enriched in this lipid. The importance of such membrane alterations relates to the physiological mode by which cells adjust the mechanical properties in response to the external stimuli by changing local lipid composition, and optimize the macroscopic structure of mitochondrial cristae to support the protein interaction in membrane-dependent processes.

## SUPPORTING MATERIAL

One figure and one table are available at [http://www.biophysj.org/biophysj/supplemental/S0006-3495\(15\)00287-8](http://www.biophysj.org/biophysj/supplemental/S0006-3495(15)00287-8).

## AUTHOR CONTRIBUTIONS

M.D.P. performed research, analyzed data, and wrote the article; K.S. designed the research, contributed analytic tools, checked, and improved the article.

## ACKNOWLEDGMENTS

This work was supported by the Nuclear Research R&D Program, the Mid-Career Researcher Program (grant No. 2011-0017539), the Advanced Research Center for Nuclear Excellence and Basic Science Research Program (grant No. 2013R1A1A2010265), and the Gwangju Institute of Science and Technology-National Core Research Center (grant No. R15-2008-006) through the National Research Foundation of Korea funded by the Ministry of Science, Information and Communications Technology & Future Planning, Korea, and Sogang University.

## REFERENCES

- Scheffler, I. E. 1999. *Mitochondria*. Wiley-Liss, Wilmington, DE.
- Ernster, L., and G. Schatz. 1981. Mitochondria: a historical review. *J. Cell Biol.* 91:227s–255s.
- Scheffler, I. E. 2001. Mitochondria make a comeback. *Adv. Drug Deliv. Rev.* 49:3–26.
- Mannella, C. A. 2006. Review. Structure and dynamics of the mitochondrial inner membrane cristae. *Biochim. Biophys. Acta.* 1763:542–548.
- Schlame, M., D. Rua, and M. L. Greenberg. 2000. The biosynthesis and functional role of cardiolipin. *Prog. Lipid Res.* 39:257–288.
- Fleischer, S., G. Rouser, ..., G. Kritchevsky. 1967. Lipid composition of mitochondria from bovine heart, liver, and kidney. *J. Lipid Res.* 8:170–180.
- Schlame, M., and M. Ren. 2009. The role of cardiolipin in the structural organization of mitochondrial membranes. *Biochim. Biophys. Acta.* 1788:2080–2083.
- Khalifat, N., N. Puff, ..., M. I. Angelova. 2008. Membrane deformation under local pH gradient: mimicking mitochondrial cristae dynamics. *Biophys. J.* 95:4924–4933.
- Sparagna, G. C., A. J. Chicco, ..., R. L. Moore. 2007. Loss of cardiac tetralinoleoyl cardiolipin in human and experimental heart failure. *J. Lipid Res.* 48:1559–1570.
- Han, X., J. Yang, ..., R. W. Gross. 2005. Shotgun lipidomics identifies cardiolipin depletion in diabetic myocardium linking altered substrate utilization with mitochondrial dysfunction. *Biochemistry.* 44:16684–16694.
- Schlame, M., and M. Ren. 2006. Barth syndrome, a human disorder of cardiolipin metabolism. *FEBS Lett.* 580:5450–5455.
- Tyurina, Y. Y., D. E. Winnica, ..., V. E. Kagan. 2013. LC/MS characterization of rotenone-induced cardiolipin oxidation in human lymphocytes: implications for mitochondrial dysfunction associated with Parkinson's disease. *Mol. Nutr. Food Res.* 57:1410–1422.
- Ohtsuka, T., M. Nishijima, ..., Y. Akamatsu. 1993. Mitochondrial dysfunction of a cultured Chinese hamster ovary cell mutant deficient in cardiolipin. *J. Biol. Chem.* 268:22914–22919.
- Mileykovskaya, E., and W. Dowhan. 2009. Cardiolipin membrane domains in prokaryotes and eukaryotes. *Biochim. Biophys. Acta.* 1788:2084–2091.
- Nichols-Smith, S., S. Y. Teh, and T. L. Kuhl. 2004. Thermodynamic and mechanical properties of model mitochondrial membranes. *Biochim. Biophys. Acta.* 1663:82–88.
- Sennato, S., F. Bordini, ..., S. Rufini. 2005. Evidence of domain formation in cardiolipin-glycerophospholipid mixed monolayers. A thermodynamic and AFM study. *J. Phys. Chem. B.* 109:15950–15957.
- Domènech, O., A. Morros, ..., J. Hernández-Borrell. 2007. Thermal response of domains in cardiolipin content bilayers. *Ultramicroscopy.* 107:943–947.
- Domènech, O., A. Morros, ..., J. Hernández-Borrell. 2007. Supported planar bilayers from hexagonal phases. *Biochim. Biophys. Acta.* 1768:100–106.
- Alessandrini, A., and U. Muscatello. 2009. AFM and FTIR spectroscopy investigation of the inverted hexagonal phase of cardiolipin. *J. Phys. Chem. B.* 113:3437–3444.
- Paradies, G., G. Petrosillo, ..., F. M. Ruggiero. 2009. Role of cardiolipin peroxidation and  $Ca^{2+}$  in mitochondrial dysfunction and disease. *Cell Calcium.* 45:643–650.
- Huang, K. C., R. Mukhopadhyay, and N. S. Wingreen. 2006. A curvature-mediated mechanism for localization of lipids to bacterial poles. *PLOS Comput. Biol.* 2:e151.
- Smaby, J. M., V. S. Kulkarni, ..., R. E. Brown. 1996. The interfacial elastic packing interactions of galactosylceramides, sphingomyelins, and phosphatidylcholines. *Biophys. J.* 70:868–877.
- Goodrich, F. C. 1957. Molecular interaction in mixed monolayers. *Proc. 2nd Int. Congr. Surface Act.* 15:85.
- Kim, J. H., S. Y. Yim, ..., K. Shin. 2012. Adsorption behaviors and structural transitions of organic cations on an anionic lipid monolayer at the air-water interface. *Soft Matter.* 8:6504–6511.
- Russell, T. P. 1990. X-ray and neutron reflectivity for the investigation of polymers. *Mater. Sci. Rep.* 5:171–271.

26. Jeworrek, C., F. Evers, ..., R. Winter. 2011. Effects of specific versus nonspecific ionic interactions on the structure and lateral organization of lipopolysaccharides. *Biophys. J.* 100:2169–2177.
27. Shin, K., Y. Pu, ..., R. Kolb. 2001. Correlated surfaces of free-standing polystyrene thin films. *Macromolecules.* 34:5620–5626.
28. Parratt, L. G. 1954. Surface studies of solids by total reflection of x-rays. *Phys. Rev.* 95:395–396.
29. Phillips, M. C., and D. Chapman. 1968. Monolayer characteristics of saturated 1,2-diacyl phosphatidylcholines (lecithins) and phosphatidylethanolamines at the air-water interface. *Biochim. Biophys. Acta.* 163:301–313.
30. Sabatini, K., J. P. Mattila, ..., P. K. J. Kinnunen. 2006. Characterization of two oxidatively modified phospholipids in mixed monolayers with DPPC. *Biophys. J.* 90:4488–4499.
31. Wang, Z., X. Li, and S. Yang. 2009. Studies of dipalmitoylphosphatidylcholine (DPPC) monolayers embedded with endohedral metallofullerene (Dy@C82). *Langmuir.* 25:12968–12973.
32. Nakahara, H., S. Lee, ..., O. Shibata. 2008. Langmuir monolayer of artificial pulmonary surfactant mixtures with an amphiphilic peptide at the air/water interface: comparison of new preparations with surfactin (surfactant TA). *Langmuir.* 24:3370–3379.
33. McConlogue, C. W., and T. K. Vanderlick. 1997. A close look at domain formation in DPPC monolayers. *Langmuir.* 13:7158–7164.
34. Lösche, M., E. Sackmann, and H. Möhwald. 1983. A fluorescence microscopic study concerning the phase diagram of phospholipids. *Ber. Bunsenges. Phys. Chem.* 87:848–852.
35. Takamoto, D. Y., M. M. Lipp, ..., J. A. Zasadzinski. 2001. Interaction of lung surfactant proteins with anionic phospholipids. *Biophys. J.* 81:153–169.
36. Tolan, M. 1999. X-Ray Scattering from Soft-Matter Thin Films. Springer, Karlsruhe, Germany.
37. Seelig, A. 1987. Local anesthetics and pressure: a comparison of dibucaine binding to lipid monolayers and bilayers. *Biochim. Biophys. Acta.* 899:196–204.
38. Daum, G. 1985. Lipids of mitochondria. *Biochim. Biophys. Acta.* 822:1–42.
39. Virtanen, J. A., K. H. Cheng, and P. Somerharju. 1998. Phospholipid composition of the mammalian red cell membrane can be rationalized by a superlattice model. *Proc. Natl. Acad. Sci. USA.* 95:4964–4969.
40. Unsay, J. D., K. Cosentino, ..., A. J. García-Sáez. 2013. Cardiolipin effects on membrane structure and dynamics. *Langmuir.* 29:15878–15887.
41. Beales, P. A., C. L. Bergstrom, ..., T. K. Vanderlick. 2011. Single vesicle observations of the cardiolipin–cytochrome-c interaction: induction of membrane morphology changes. *Langmuir.* 27:6107–6115.

# Effects of Cardiolipin on Membrane Morphology: A Langmuir Monolayer Study

**Authors:** Minh Dinh Phan and Kwanwoo Shin\*

Department of Chemistry and Institute of Biological Interfaces, Sogang University, 35 Baekbeom-ro, Mapo-gu, Seoul 121-742, Korea

Keywords: Cardiolipin, Langmuir Monolayer, Isotherm, Phospholipids

\*Corresponding author. (K. S.) Email: kwshin@sogang.ac.kr; Tel: 82-2-705-8441; Fax: 82-2-701-0967

## SUPPORTING MATERIAL

### Supporting Figures

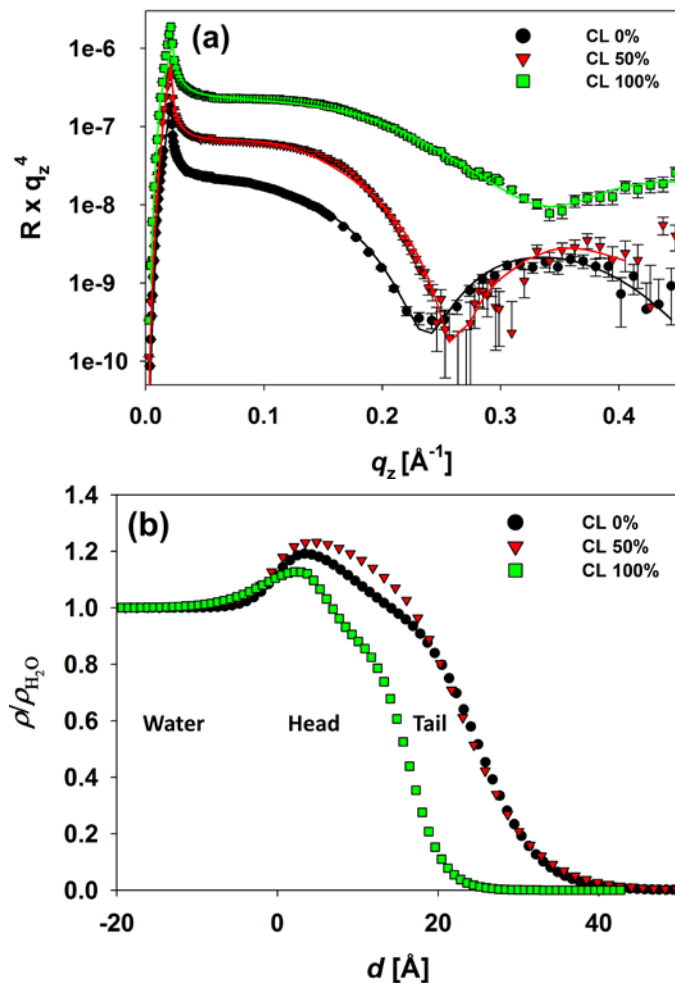

Figure S1: (a) XR curves measured at the water-air interface for monolayers composed of  $\Phi_{\text{CL}} = 50 \text{ mol\%}$ , in comparison with pure DPPC (CL 0%) and pure CL (CL 100%). The solid lines are the least-square fits. (b)

Corresponding normalized electron density profiles of monolayers obtained from the reflectivity fits of (a). All of measurements were carried out at  $\pi = 30$  mN/m. The temperature was maintained at 16 °C.

Table S1: X-ray reflectivity fitting parameters for  $\Phi_{\text{CL}} = 50$  mol%, in comparison with smaller molar ratios of CL, where the electron density  $\rho_{\text{h}}$  and  $\rho_{\text{t}}$ , the thickness  $d_{\text{h}}$  and  $d_{\text{t}}$  for the headgroup and the tail group regions, respectively, and the interfacial roughnesses  $\sigma_{\text{h/t}}$  and  $\sigma_{\text{t/a}}$  for headgroup/tail and tail group/air interfaces, respectively.

|      | $\sigma_{\text{w}}$ (Å) <sup>b</sup> | $\rho_{\text{h}}$ (e <sup>-</sup> /Å <sup>3</sup> ) <sup>a</sup> | $\sigma_{\text{h/t}}$ (Å) <sup>b</sup> | $d_{\text{h}}$ (Å) <sup>b</sup> | $\rho_{\text{t}}$ (e <sup>-</sup> /Å <sup>3</sup> ) <sup>a</sup> | $\sigma_{\text{t/a}}$ (Å) <sup>b</sup> | $d_{\text{t}}$ (Å) <sup>b</sup> |
|------|--------------------------------------|------------------------------------------------------------------|----------------------------------------|---------------------------------|------------------------------------------------------------------|----------------------------------------|---------------------------------|
| 0%   | 3.0                                  | 4.51                                                             | 5.9                                    | 8.5                             | 3.60                                                             | 6.6                                    | 16.6                            |
| 5%   | 3.0                                  | 4.76                                                             | 7.5                                    | 8.0                             | 3.50                                                             | 5.4                                    | 16.5                            |
| 10%  | 3.0                                  | 4.65                                                             | 7.9                                    | 8.0                             | 3.45                                                             | 5.3                                    | 16.5                            |
| 20%  | 3.0                                  | 4.64                                                             | 9.9                                    | 8.0                             | 3.65                                                             | 6.3                                    | 17.0                            |
| 50%  | 3.0                                  | 4.67                                                             | 10.1                                   | 7.9                             | 4.28                                                             | 8.0                                    | 14.7                            |
| 100% | 5.7                                  | 4.40                                                             | 3.1                                    | 5.7                             | 3.18                                                             | 3.7                                    | 10.6                            |

<sup>a</sup> The uncertainty of  $\rho$  was 2% of the value. <sup>b</sup> The error range of  $\sigma$  and  $d$  was  $< \pm 0.2$  Å.
